# Supplementary material
Source: PubMed Central journal article supplement (PMC4335906)
Supplement: AAC.03265-14_zac002153706so1.pdf [file AAC.03265-14_zac002153706so1.pdf]

## 1 **Supplementary Material and Methods**

### 2 **PCR conditions and multiplex primer mixtures**

3 Four primary PCR reactions were set up with the following primer combinations  
4 (sequences are given in Table S1): Mix 1 (P1-1 for\_P, P1\_1 rev\_P, P3-1 for\_P, P3-1  
5 rev\_P, P8-1 for\_P SL, P8-1 rev\_P, P10-1 for\_P, and P10-1 rev\_P), Mix 2 (P5-1 for\_P,  
6 P5-1 rev\_P SL, P11-1 for\_P, P11\_1 rev\_P, P12-1 for\_P, P12-1 rev\_P), Mix 3 (P18-1  
7 for\_P SL and P18-1 rev\_P), and Mix 4 (P16-1 for\_P SS and P16-1 rev\_P SS). Nested  
8 PCR reactions were conducted individually as nP1 (P1 for\_N and P1 rev\_N), nP3 (P3  
9 for\_N SL and P3 rev\_N), nP5 (P5 for\_N and P5 rev\_N SL), nP8 (P8 for\_N and P8  
10 rev\_N SL), nP10 (P10 for\_N and P10 rev\_N SS), nP11 (P11 for\_N and P11 rev\_N),  
11 nP12 (P12 for\_N and P12 rev\_N), nP18 (P18 for\_N and P18 rev\_N), nP16 (P16  
12 for\_N and P16 rev\_N SL). All reactions were run with the following program:  
13 denaturation for 3 min at 96°C followed by 30 cycles of 96°C for 30 sec, 52°C for 90  
14 sec, and 72°C for 90 sec, except reaction Mix 3 and nP16 for which the annealing  
15 temperature was of 48°C instead of 52°C.

16

### 17 **Synthesis and characterization of compounds 1, 2, 3**

18 All reactions were carried out under nitrogen atmosphere or in sealed vials unless  
19 noted otherwise. Dry solvents and reagents were of commercial quality and were used  
20 as purchased. Reactions were magnetically stirred and monitored by thin-layer  
21 chromatography (TLC) using Merck silica gel 60 F254 by fluorescence quenching  
22 under UV light or by LCMS detection, except if indicated otherwise. LCMS-analyses  
23 were run on Agilent 1100/1200 series instruments. In addition, TLC plates were

24 stained using phosphomolybdic acid or potassium permanganate stain.  
 25 Chromatographic purification of products (flash chromatography) was performed on  
 26 Biotage Isolera systems and ethyl acetate/heptane gradients. Concentration under  
 27 reduced pressure was performed by rotary evaporation at 40°C at the appropriate  
 28 pressure unless otherwise stated. The purity of the compounds reported in the  
 29 manuscript was established through HPLC-MS methodology. HPLC analyses were  
 30 run according to the LCMS method. <sup>1</sup>H-NMR (in DMSO-D<sub>6</sub>) and mass spectra are in  
 31 agreement with the structures and were recorded on a Bruker AMX 400 MHz NMR  
 32 spectrometer (TMS as an internal standard). All the compounds reported in the  
 33 manuscript have a purity ≥ 95 % unless noted otherwise.

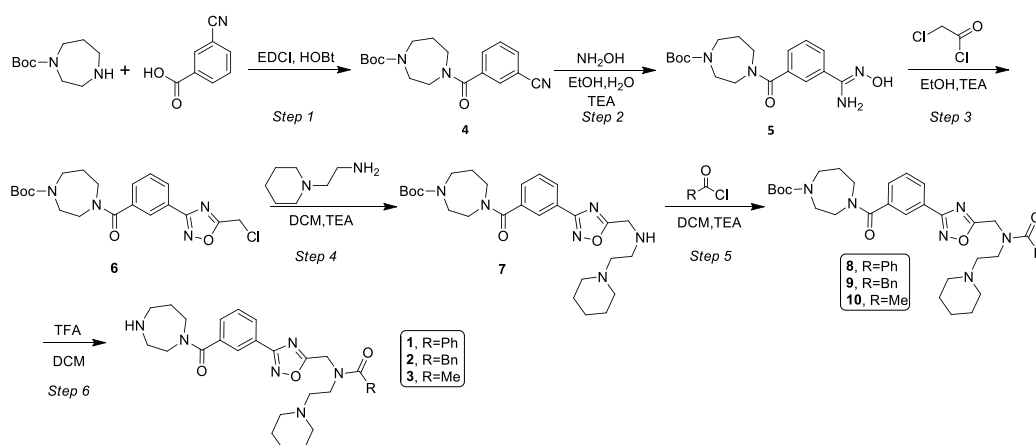

34  
 35 *Step 1.* To a solution of 4-cyano benzoic acid (4 g, 27 mmol) and *N*-Boc diazepene  
 36 (5.9 g, 29.9 mmol) in DCM (50 mL) triethylamine (11.3 mL, 81.5 mmol) was added  
 37 and stirred for 5 h. To this solution was added EDCI.HCl (6.7 g, 35.1 mmol) and  
 38 HOBT (0.73 g, 5.4 mmol) and stirred at RT overnight. The reaction mixture was  
 39 diluted with DCM, and washed with saturated sodium bicarbonate solution followed  
 40 by water and brine solution (NaCl sat aqueous). The combined organic layer was  
 41 dried on anhydrous Na<sub>2</sub>SO<sub>4</sub> and solvents were removed by reduced pressure. The  
 42 crude material was purified by column chromatography over silica gel (230-400

43 mesh) using 15% ethyl acetate in petroleum ether as an eluent to afford the amide **4**  
44 (4.5 g, 50%). *Step 2.* To a solution of compound **4** (3 g, 9.1 mmol) in EtOH:H<sub>2</sub>O  
45 (30:10 mL) mixture was added hydrazine hydrate (0.95 g, 13.6 mmol) and  
46 triethylamine (3.16 mL, 22.7 mmol) and heated at 100°C for 3 h. After checking the  
47 conversion of the starting material, the reaction mixture was cooled to RT and  
48 concentrated under reduced pressure to yield compound **5** (5 g) as a crude white solid.  
49 *Step 3.* To a solution of compound **5** (3 g, 8.28 mmol) in ethanol (15 mL)  
50 triethylamine (1.72 mL, 12.4 mmol) was added and stirred at 0°C for 5 minutes. Then  
51 chloro acetylchloride was added to the reaction mixture at 0°C and was heated at 80°C  
52 in a sealed tube for 3 h. After checking the TLC, reaction mixture was cooled to RT,  
53 and removed the solvent under reduced pressure. The residue obtained was dissolved  
54 in DCM, washed with water, and the organic layer dried over anhydrous Na<sub>2</sub>SO<sub>4</sub>. The  
55 crude material obtained was purified by column chromatography over silica gel (230-  
56 400 mesh) using 90% of ethyl acetate in petroleum ether as an eluent to afford the  
57 chloro intermediate **6** [0.83 g, 21% (combined yield step 2&3)] as a gummy liquid.  
58 *Step 4.* To a solution of chloro intermediate **6** (0.83 g, 1.99 mmol) in DCM, was  
59 added TEA (1.2 mL, 5.9 mmol) and stirred for 5 minutes, followed by drop wise  
60 addition of 2-(piperidin-1-yl)ethanamine (0.38 g, 2.96 mmol) and the reaction mixture  
61 was stirred at RT overnight. After completion of the starting material, the reaction  
62 mixture was diluted with DCM and given a water wash followed by brine wash. The  
63 combined organic layer was dried over anhydrous Na<sub>2</sub>SO<sub>4</sub> and the solvent was  
64 removed under reduced pressure to obtain a crude oil. The crude material was purified  
65 by column chromatography over silica gel (230-400 mesh) using 4-6% of MeOH in  
66 DCM as an eluent to afford compound **7** (0.8 g, 79%) as a brown liquid.

67 **N-((3-(3-(1,4-diazepane-1-carbonyl)phenyl)-1,2,4-oxadiazol-5-yl)methyl)-N-(2-**  
68 **(piperidin-1-yl)ethyl)acetamide (3)**

69 *Step 5.* To a solution of compound **7** (0.25 g, 0.48 mmol) in DCM (10 mL), TEA (0.2  
70 mL, 1.46 mmol) was added and allowed to stir for 5 minutes. The reaction mixture  
71 was cooled to 0°C followed by the addition of acetyl chloride (0.057 g, 0.7 mmol) and  
72 the whole warmed to RT and stirred for 30 minutes. The reaction mixture was diluted  
73 with DCM and washed with water and brine. The organic layer was collected, dried  
74 over anhydrous Na<sub>2</sub>SO<sub>4</sub> and the solvent removed under reduced pressure. The crude  
75 material was purified by column chromatography over silica gel (230-400 mesh)  
76 using 4-6% of methanol (v/v) in DCM as an eluent to afford compound **8** (0.1 g, 40%)  
77 as a brown liquid. *Step 6.* To a solution of compound **8** (0.1 g, 0.16 mmol) in DCM (3  
78 mL), TFA (0.3 g, 2.4 mmol) was added at 0°C and stirred at room temperature (RT)  
79 for 2 h. After completion of the reaction, the solvent mixture was removed under  
80 reduced pressure. The residue obtained was dissolved in DCM and, to this, ion  
81 exchange resin was added and stirred for 30 min. The resin was filtered off and the  
82 filtrate concentrated to give **1** (0.07 g, 86%) as a gummy liquid. <sup>1</sup>H NMR, 400 MHz,  
83 DMSO-d<sub>6</sub>: δ 8.03 (d, *J* = 7.40 Hz, 1H), 7.94 (s, 1H), 7.64-7.57 (m, 2H), 4.86 (s, 2H),  
84 3.57 (s, 5H), 2.82 (t, *J* = 5.68 Hz, 3H), 2.38-2.32 (m, 5H), 2.13 (s, 3H), 1.70 (s, 2H),  
85 1.43-1.26 (m, 6H). LC-MS APCI: Calculated for C<sub>24</sub>H<sub>34</sub>N<sub>6</sub>O<sub>3</sub> 454.58; Observed m/z  
86 [M+H]<sup>+</sup> 455.4. Purity by LC-MS: 99.64%. Purity by HPLC: 99.78%.

87 **N-((3-(3-(1,4-diazepane-1-carbonyl)phenyl)-1,2,4-oxadiazol-5-yl)methyl)-N-(2-**  
88 **(piperidin-1-yl)ethyl)benzamide (1)**

89 Yield: (50 mg, 60%). <sup>1</sup>H NMR, 400 MHz, DMSO-d<sub>6</sub>: δ 8.07-8.05 (m, 1H), 7.97 (s,  
90 1H), 7.66-7.58 (m, 2H), 7.48-7.44 (m, 5H), 5.02 (s, 2H), 3.67-3.46 (m, 4H), 2.84 (t, *J*  
91 = 11.48 Hz, 4H), 2.32-2.24 (m, 4H), 1.73-1.71 (m, 2H), 1.43-1.39 (m, 4H), 1.33-1.27

92 (m, 3H). LC-MS APCI: Calculated for C<sub>29</sub>H<sub>36</sub>N<sub>6</sub>O<sub>3</sub> 516.65; Observed m/z [M+H]<sup>+</sup>  
93 517.4. Purity by LC-MS: 97.58%. Purity by HPLC: 99.79%.

94 **N-((3-(3-(1,4-diazepane-1-carbonyl)phenyl)-1,2,4-oxadiazol-5-yl)methyl)-2-**  
95 **phenyl-N-(2-(piperidin-1-yl)ethyl)acetamide (2)**

96 Yield: (70 mg, 84%). <sup>1</sup>H NMR, 400 MHz, DMSO-d<sub>6</sub>: δ 8.05-8.00 (m, 2H), 7.67-7.61  
97 (m, 2H), 7.28-7.22 (m, 5H), 4.91 (s, 2H), 3.85 (s, 2H), 3.62-3.55 (m, 5H), 3.18-3.06  
98 (m, 3H), 2.51-2.46 (m, 2H), 2.37-2.34 (m, 4H), 1.87 (s, 2H), 1.43-1.27 (m, 7H), 0.88  
99 (t, *J* = 13.72 Hz, 3H). LC-MS APCI: Calculated for LC-MS APCI: Calculated for  
100 C<sub>29</sub>H<sub>36</sub>N<sub>6</sub>O<sub>3</sub> 530.68; Observed m/z [M+H]<sup>+</sup> 531.4. Purity by LC-MS: 98.15%. Purity  
101 by HPLC: 97.71%.

102

### 103 **Expression of HDP and falcipain 2**

104 The cultures of bacteria containing plasmid pHDP were grown to mid-exponential  
105 phase and induced with isopropyl-1-thio-β-D-galactopyranoside (IPTG, 1 mM) for 4  
106 h at 37°C and harvested by centrifugation at 4000 x g for 20 min. The total cell pellet  
107 was then resuspended in wash buffer (50 mM Tris-HCl, pH 7.5, 20 mM EDTA) with  
108 0.5 mg/ml lysozyme, incubated for 1 h at room temperature with intermittent shaking.  
109 The washed cell pellet was lysed after adding wash buffer containing 0.5 M NaCl and  
110 2.5% Triton X-100. The inclusion bodies were pelleted by centrifugation at 13,000  
111 rpm for 50 min at 4°C, resuspended in wash buffer containing 1% Triton X-100 using  
112 a sonicator, pelleted again, and then washed twice in wash buffer without Triton X-  
113 100. The inclusion bodies were solubilized for 30 min in 50 mM CAPS buffer (pH  
114 11.0) containing 1.5% N-lauryl sarcosine and 0.3 M NaCl and centrifuged at 10,000 x  
115 g for 30 min. The protein was purified from the supernatant using a His-Trap, a high

116 performance nickel affinity column (GE Healthcare) by an imidazole gradient in 50  
117 mM CAPS pH 11.0 containing 0.3% N-lauryl sarcosine and 0.3 M NaCl. Protein-  
118 containing fractions were pooled and dialyzed against 25 mM CAPS buffer (pH 11.0)  
119 containing 135 mM NaCl (30, 34).

120 For the expression of recombinant falcipain 2, bacteria containing plasmid pQE30-  
121 FP2 were grown to mid-exponential phase and induced with 0.5 mM IPTG for 5 h at  
122 37°C. The cells were harvested, washed with ice-cold 100 mM Tris-HCl pH 7.4, 10  
123 mM EDTA buffer, sonicated (12 cycles of 10 s each, with cooling for 10 s between  
124 the cycles), and centrifuged at 15,000 rpm for 45 min at 4°C. The pellet was  
125 solubilized in 6 M guanidine HCl, 20 mM Tris-Cl, 250 mM NaCl, 20 mM imidazole,  
126 pH 8.0 (5 ml/g of inclusion body pellet) at RT for 60 min with gentle stirring.  
127 Insoluble material was separated by centrifuging at 15,000 rpm for 60 min at 4°C.  
128 Recombinant protein was purified from the supernatant using a nickel-nitrilotriacetic  
129 acid (Ni-NTA+) resin (Qiagen). The bound proteins were eluted with 1M imidazole in  
130 20 mM Tris-HCl, pH 8.0 buffer containing 8M urea and quantified using Bradford  
131 assay (Pierce).

132 For refolding of protein, the fractions containing falcipain 2 protein were pooled and  
133 diluted 100-fold in ice-cold refolding buffer containing: 100 mM Tris-HCl pH 8.0, 1  
134 mM EDTA, 20% glycerol (v/v), 250 mM L-arginine, 1 mM GSH, 1 mM GSSG. The  
135 diluted protein was stirred moderately at 4°C for 24 h, concentrated to 25 mL using a  
136 stirred cell with a 10-kDa cut-off membrane (Pellicon XL device, Millipore) at 4°C  
137 and then filtered using a 0.22- $\mu$ m syringe filter.

138 **Enzymatic conversion of haem to haemozoin in presence of antimalarial**  
139 **compounds**

140 The stock of 10 mM haem was prepared in 0.01 N NaOH. In a buffered reaction with  
141 500 mM sodium acetate pH 5.2, 0.5  $\mu$ M of HDP was added to the reaction and  
142 incubated at 37 °C for 3 h with a final concentration of 600  $\mu$ M haem. The HDP  
143 treated with antimalarial compounds 1 and 2 (50  $\mu$ M) at 37°C for 10 min was added to  
144 the reaction for assessment of effect of compounds on HDP in an enzymatic  
145 conversion of haem to haemozoin. The haem not sequestered into haemozoin was  
146 washed thoroughly with 2.5% SDS and 0.1 M sodium bicarbonate (pH 9.1) followed  
147 by a distilled water wash until soluble haem was not seen in the supernatant. The  
148 haemozoin pellet formed was resuspended in 1 mL of 0.1 N NaOH and the  
149 absorbance measured at 400 nm. A reaction with haem alone was used a negative  
150 control. The percentage of haemozoin formation was calculated using a molar  
151 extinction coefficient of  $1 \times 10^5 \text{ M}^{-1} \text{ cm}^{-1}$  (34).

152

153 ***In vitro* haemozoin Formation Assay from haemoglobin**

154 Recombinant falcipain 2 and HDP added at a final concentration of 0.5  $\mu$ M each were  
155 mixed with a freshly prepared solution of haemoglobin from red blood cells in a  
156 reaction that was buffered with 500 mM sodium acetate pH 5.2, 5 mM reduced  
157 glutathione and was incubated at 37°C for 3 h. Unsequestered haem was repeatedly  
158 washed with 2.5% SDS and 0.1 M sodium bicarbonate (pH 9.1) followed by distilled  
159 water wash until no soluble haem was visible in the supernatant. The haemozoin  
160 pellet was resuspended in 1 mL of 0.1 N NaOH and absorbance was measured at 400  
161 nm. A reaction with buffered haemoglobin alone was used as a negative control. The  
162 percentage of haemozoin formation was calculated as described above. The reaction

163 with the antimalarial compounds was set with initial addition of falcipain 2 that  
164 allowed digestion of haemoglobin. Compounds **1**, **2** (50  $\mu\text{M}$ ) or chloroquine (2  $\mu\text{M}$ )  
165 were then added to see whether their binding released haem. Subsequently, HDP was  
166 added to this reaction to allow haemozoin formation. The amount of haemozoin  
167 produced was then calculated as described above.



168 **Supplementary Tables**

169 **TABLE S1** Primers for PCR amplification

| Primer ID      | Type    | Primary PCR amplification   | Sequence (5'to 3')             | Codons sequenced |
|----------------|---------|-----------------------------|--------------------------------|------------------|
| P1-1 for_P     | Primary | <i>mdr1</i> , 1st fragment  | TAAATGTTTACCTGCACAACATAGAAAAT  |                  |
| P1-1 rev_P     | Primary | <i>mdr1</i> , 1st fragment  | CTCCACAATAACTTGCAACAGTTCTTA    |                  |
| P3-1 for_P     | Primary | <i>mdr1</i> , 2nd fragment  | AATTTGATAGAAAAAGCTATTGATTATAA  |                  |
| P3-1 rev_P     | Primary | <i>mdr1</i> , 2nd fragment  | TATTTGGTAATGATTGATAAATTCATC    |                  |
| P5-1 for_P     | Primary | <i>dhfr</i>                 | TTTATGATGGAACAAGTCTGC          |                  |
| P5-1 rev_P SL  | Primary | <i>dhfr</i>                 | AGTATATACATCGCTAACAGA          |                  |
| P8-1 for_P SL  | Primary | <i>dhps</i>                 | ATTTTTGTTGAACCTAAACGTGCTGTTCA  |                  |
| P8-1 rev_P     | Primary | <i>dhps</i>                 | CTTGTCTTTCCTCATGTAATTCATCT     |                  |
| P10-1 for_P    | Primary | <i>crt</i> , 1st fragment   | TTGTCGACCTTAACAGATGGCTCAC      |                  |
| P10-1 rev_P    | Primary | <i>crt</i> , 1st fragment   | AATTTCCCTTTTTATTTCCAAATAAGGA   |                  |
| P11-1 for_P    | Primary | <i>crt</i> , 3rd fragment   | ATTTACTCCTTTTTAGATATCACTTA     |                  |
| P11-1 rev_P    | Primary | <i>crt</i> , 3rd fragment   | TTATATTTTTTAAAACTATTTCCCTTG    |                  |
| P12-1 for_P    | Primary | <i>crt</i> , fifth fragment | AGGAAATAAATATGGGAATGTTTAATTGA  |                  |
| P12-1 rev_P    | Primary | <i>crt</i> , fifth fragment | TTCTAAGATAATATTTCTACACGGT      |                  |
| P16-1 for_P SS | Primary | <i>crt</i> , 4th fragment   | TCTGTTATTTTTATTTCTTATAGGCTAT   |                  |
| P16-1 rev_P SS | Primary | <i>crt</i> , 4th fragment   | CTTGTATGTATCAACGTTTTTCATCC     |                  |
| P18-1 for_P SL | Primary | <i>crt</i> , 2nd fragment   | ACTTTATTTGTATGATTATG TTC       |                  |
| P18-1 rev_P    | Primary | <i>crt</i> , 2nd fragment   | TAACTGCTCCGAGATAATTGT          |                  |
| Cytb1_for_P    | Primary | <i>cytb</i>                 | CTCTATTAATTTAGTTAAAGCACA       |                  |
| Cytb2_rev_P    | Primary | <i>cytb</i>                 | ACAGAATAATCTCTAGCACC           |                  |
| P1 for_N       | Nested  | <i>mdr1</i> , 1st fragment  | TGTATGTGCTGTATTATCAGGA         | 61 – 236         |
| P1 rev_N       | Nested  | <i>mdr1</i> , 1st fragment  | CTCTTCTATAATGGACATGGTA         |                  |
| P3 for_N       | Nested  | <i>mdr1</i> , 2nd fragment  | GAATTATTGTAATGCAGCTTTATG       | 1023 – 1289      |
| P3 rev_N       | Nested  | <i>mdr1</i> , 2nd fragment  | GCAGCAAACCTACTAACACG           |                  |
| P5 for_N       | Nested  | <i>dhfr</i>                 | ACAAGTCTGCGACGTTTTTCGATATTTATG | 3 – 216          |
| P5 rev_N SL    | Nested  | <i>dhfr</i>                 | TAGTATATACATCGCTAACAGAAAT      |                  |
| P8 for_N       | Nested  | <i>dhps</i>                 | TTGAAATGATAAATGAAGGTGCTAGT     | 419 – 647        |
| P8 rev_N SL    | Nested  | <i>dhps</i>                 | CCAATTGTGTGATTTGTCCAC          |                  |
| P10 for_N      | Nested  | <i>crt</i> , 1st fragment   | CTTGTCTTGGTAAATGTGCTC          | 39 – 108         |
| P10 rev_N SS   | Nested  | <i>crt</i> 1st fragment     | CAATAAAGAACATAATCATACAAATAAAGT |                  |
| P11 for_N      | Nested  | <i>crt</i> , 3rd fragment   | ACAATTATCTCGGAGCAGTTA          | 182 - 229        |
| P11 rev_N      | Nested  | <i>crt</i> , 3rd fragment   | CATGTTTGAAAAGCATAACAGGC        |                  |
| P12 for_N      | Nested  | <i>crt</i> , fifth fragment | ACCATGACATATACTATTGTTAG        | 342 – 390        |
| P12 rev_N      | Nested  | <i>crt</i> , fifth fragment | TTATAGAACCAAATAGGTAGCC         |                  |
| P16 for_N      | Nested  | <i>crt</i> , 4th fragment   | CTTTTTCCAATTGTTCACTTCTTG       | 250 - 335        |
| P16 rev_N SL   | Nested  | <i>crt</i> , 4th fragment   | TCTTACATAGCTGGTTATTAAT         |                  |
| P18 for_N      | Nested  | <i>crt</i> , 2nd fragment   | TCCTTATTTGAAATAAAAAGGGAAATT    | 80 - 181         |
| P18 rev_N      | Nested  | <i>crt</i> , 2nd fragment   | TAAGTGATATCTAAAAAGGAGTAAAT     |                  |
| Cytb6_for_N    | Nested  | <i>cytb</i>                 | CTGCTTTCGTTGGTTATGTCTT         | 121 - 302        |

|             |        |             |                           |  |
|-------------|--------|-------------|---------------------------|--|
| Cytb7_rev_N | Nested | <i>cytb</i> | AGTTGTTAAACTTCTTTGTTCTGCT |  |
|-------------|--------|-------------|---------------------------|--|

170 **TABLE S2** Sensitivity of the selected panel of standard laboratory strains to 72 hours of exposure to various antimalarial compounds

| Strain  | Artesunate                    |     | Chloroquine                   |      | Mefloquine                    |     | Pyrimethamine                 |       | Atovaquone                    |       | Cycloquanil                   |       |
|---------|-------------------------------|-----|-------------------------------|------|-------------------------------|-----|-------------------------------|-------|-------------------------------|-------|-------------------------------|-------|
|         | IC <sub>50</sub> <sup>a</sup> | SD  | IC <sub>50</sub> <sup>a</sup> | SD   | IC <sub>50</sub> <sup>a</sup> | SD  | IC <sub>50</sub> <sup>a</sup> | SD    | IC <sub>50</sub> <sup>a</sup> | SD    | IC <sub>50</sub> <sup>a</sup> | SD    |
| NF54    | 4.5                           | 0.0 | 7.4                           | 0.9  | 15.5                          | 0.5 | 19.5                          | 0.5   | 0.5                           | 0.0   | 4.5                           | 0.2   |
| D6      | 4.1                           | 0.1 | 8.4                           | 0.2  | 7.8                           | 1.5 | 5.5                           | 0.1   | 0.2                           | 0.1   | 1.7                           | 0.1   |
| HB3     | 3.1                           | 0.5 | 8.4                           | 0.7  | 8.0                           | 3.1 | 1082.0                        | 61.0  | 0.3                           | 0.1   | 18.5                          | 2.0   |
| FCB     | 3.8                           | 0.3 | 83.5                          | 2.0  | 13.5                          | 1.0 | 19.0                          | 0.0   | 0.7                           | 0.1   | 1164.5                        | 4.0   |
| 7G8     | 1.8                           | 0.2 | 61.5                          | 2.0  | 2.5                           | 0.4 | >10000                        | n/a   | 0.3                           | 0.0   | 453.0                         | 0.0   |
| K1      | 2.4                           | 0.5 | 199.5                         | 17.0 | 4.1                           | 0.1 | 9812.0                        | 158.0 | 0.6                           | 0.0   | 409.0                         | 9.0   |
| Dd2     | 5.0                           | 0.5 | 168.5                         | 19.0 | 10.9                          | 2.2 | 9109.0                        | 777.0 | 0.6                           | 0.2   | 1965.0                        | 44.0  |
| V1/S    | 3.5                           | 0.2 | 305.0                         | 9.0  | 6.9                           | 0.3 | >10000                        | n/a   | 0.9                           | 0.1   | 9693.0                        | 291.0 |
| TM90C2B | 3.4                           | 0.4 | 138.5                         | 25.0 | 16.0                          | 1.0 | >10000                        | n/a   | 6195                          | 154.0 | 6062.5                        | 129.0 |

171 <sup>a</sup>average median growth inhibition values in nM (n≥2)

172 **TABLE S3** Sensitivity of the selected panel of standard laboratory strains to 72 hours of exposure to compounds 1, 2, and 3 of the 1,2,4-  
 173 oxadiazole series

| Strain  | Compound 1                    |       | Compound 2                    |       | Compound 3                    |        |
|---------|-------------------------------|-------|-------------------------------|-------|-------------------------------|--------|
|         | IC <sub>50</sub> <sup>a</sup> | SD    | IC <sub>50</sub> <sup>a</sup> | SD    | IC <sub>50</sub> <sup>a</sup> | SD     |
| NF54    | 40.5                          | 9.5   | 58.0                          | 15.0  | 292.5                         | 52.5   |
| D6      | 174.0                         | 2.0   | 274.3                         | 82.1  | 1045.7                        | 157.8  |
| HB3     | 57.0                          | 11.0  | 80.0                          | 14.0  | 220.0                         | 24.0   |
| FCB     | 3032.5                        | 14.5  | 2978.0                        | 227.0 | >10000                        | n/a    |
| 7G8     | 1082.0                        | 180.0 | 1087.0                        | 160.0 | 2051.5                        | 359.5  |
| K1      | 3004.0                        | 333.0 | 2481.0                        | 363.0 | 11043.5                       | 1313.5 |
| Dd2     | 1202.0                        | 358.0 | 1344.5                        | 66.5  | 2990.5                        | 586.5  |
| V1/S    | 2398.5                        | 166.5 | 2123.5                        | 175.5 | 6867.0                        | 615.0  |
| TM90C2B | 2432.0                        | 139.5 | 2686.0                        | 272.0 | 5542.5                        | 12.5   |

174 <sup>a</sup>average median growth inhibition values in nM (n≥2)

175 **TABLE S4** *In vitro* abiotic  $\beta$ -haematin formation inhibition by compounds **1**, **2**, and **3** of the  
176 1,2,4-oxadiazole series

| <b>Compound</b> | <b><math>\beta</math>-haematin Inhibition IC<sub>50</sub> (<math>\mu</math>M)</b> |
|-----------------|-----------------------------------------------------------------------------------|
| 1               | 452 $\pm$ 65.4                                                                    |
| 2               | 587 $\pm$ 129                                                                     |
| 3               | <i>Inactive at 1000 <math>\mu</math>M</i>                                         |
| Amodiaquine     | 43.5 $\pm$ 5.32                                                                   |

177

**Figure S1**

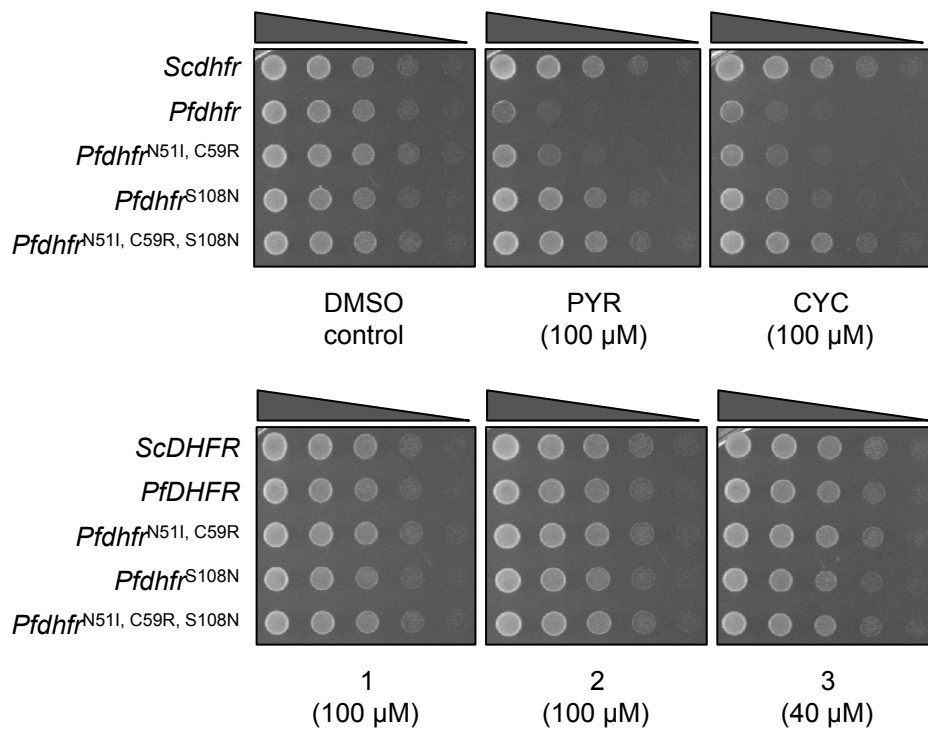

**Figure S1 Sensitivity of yeast strains expressing heterologous dihydrofolate reductase genes**

Serial dilutions (5x) of yeast cultures expressing *Saccharomyces cerevisiae* (*Sc*) and wild-type or mutated *Plasmodium falciparum* (*Pf*) *dhfr* were spotted on agar plates containing a control concentration of DMSO or the indicated concentrations of pyrimethamine (PYR), cycloguanil (CYC), or of the 1,2,4-oxadiazole series compounds (**1,2,3**). Pyrimethamine inhibits the growth of yeast strains expressing *PfDHFR* as opposed to the native enzyme. Growth inhibition is specifically decreased by *Pfdhfr* mutations N51I, C59R, mutation S108N, and a combination thereof. The 1,2,4-oxadiazole series compounds do not inhibit the growth of any of the yeast strains tested. The highest concentration tested for each compound is reported.

**Figure S2**

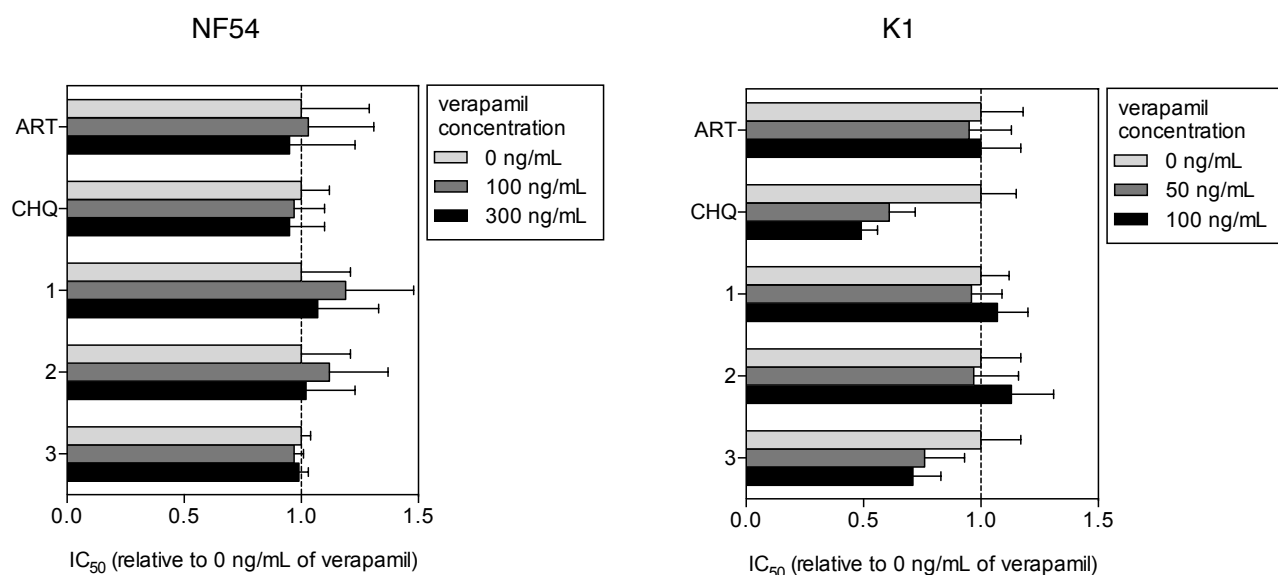

**Figure S2 Interaction between verapamil and the 1,2,4-oxadiazole series**

The  $IC_{50}$  of artesunate (ART), chloroquine (CHQ), and of the 1,2,4-oxadiazole series compounds (**1,2,3**) in combination with various concentrations of verapamil are indicated for the chloroquino-sensitive strain NF54 and the chloroquino-resistant strain K1.  $IC_{50}$  are expressed relative to the 0 ng/mL verapamil condition ( $n=4$ , error bars represent SEM). Verapamil induces a specific and dose-dependent increase of K1 sensitivity to chloroquine (2.0 fold increase at 100 ng/mL). A similar effect is apparent with compound **3** only but to a lower extent (1.4 fold increase at 100 ng/mL). Concentrations of 50, 100, and 300 ng/mL of verapamil correspond to 110.1, 220.3, and 660.8 nM, respectively.

**Figure S3**

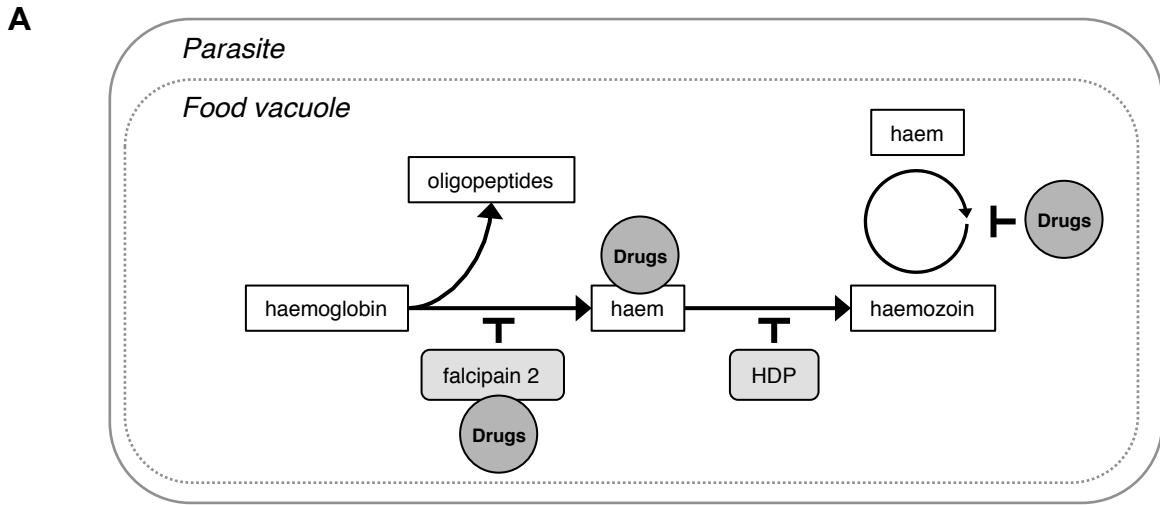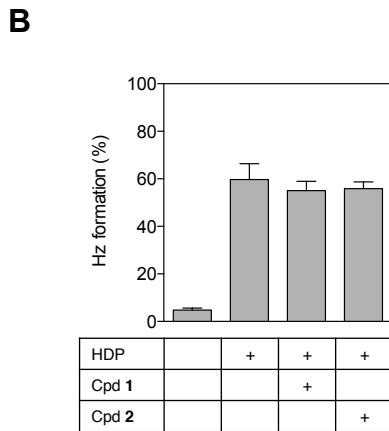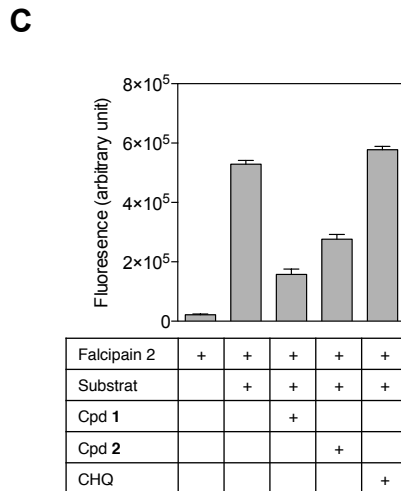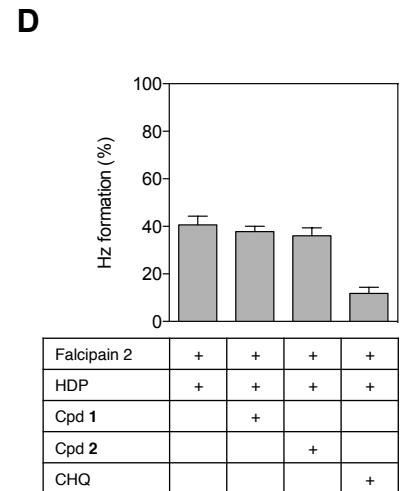

**Figure S3. Activity of the 1,2,4-oxadiazole series in haemozoin formation.**

(A) Schematic model of the multi-enzyme haemozoin formation complex in the *Plasmodium falciparum* food vacuole with the potential inhibitory mode of action of drugs. (B) Effect of pre-incubation of HDP with 50  $\mu$ M of compounds **1** and **2** on haemozoin formation. (C) Effect of compounds **1**, **2**, and chloroquine (CHQ) at 5  $\mu$ M on falcipain 2 catalytic activity. (D) Effect of pre-incubation of falcipain 2 with compound **1**, **2** (50  $\mu$ M), or CHQ (2  $\mu$ M) on haemozoin formation. For panels B to D, n=2 and error bars represent SD.
